# Supplementary material for: Graphitic carbon nitride with thermally-induced nitrogen defects: an efficient process to enhance photocatalytic H2 production performance
Source: Royal Society of Chemistry journal article supplement (doi:10.1039/d0ra01425g), 2020-01-01
Supplement: d0ra01425g1.pdf [file d0ra01425g1.pdf]

## *Supplementary Information*

### **Graphitic carbon nitride with thermal-induced nitrogen defects: an efficient process to enhance photocatalytic H<sub>2</sub> production performance**

Guangzhi Dong<sup>a,b</sup>, Yun Wen<sup>a</sup>, Huiqing Fan<sup>a\*</sup>, Chao Wang<sup>a,c</sup>,  
Zhenxiang Cheng<sup>b</sup>, Mingchang Zhang<sup>a</sup>, Jiangwei Ma<sup>a</sup>, Shujun Zhang<sup>b</sup>

*a. State Key Laboratory of Solidification Processing, School of Materials Science and Engineering, Northwestern Polytechnical University, Xi'an, 710072, PR China.*

*b. Institute for Superconducting and Electronic Materials, Australia Institute of Innovative Materials, University of Wollongong, Wollongong, 2522, Australia.*

*c. Department of Chemical Engineering, University College London, Torrington Place, London WC1E 7JE, United Kingdom.*

---

\* Corresponding author: hqfan@nwpu.edu.cn; hqfan3@163.com

**Table S1.** Distribution of N atoms in the samples.

| Samples | C-N=C (N <sub>2C</sub> ; %) | N-(C) <sub>3</sub> (N <sub>3C</sub> ; %) | -NH <sub>x</sub> (N <sub>1C</sub> ; %) | N <sub>2C</sub> :N <sub>3C</sub> |
|---------|-----------------------------|------------------------------------------|----------------------------------------|----------------------------------|
| CN      | 78.22                       | 11.82                                    | 9.96                                   | 6.61                             |
| CN2     | 78.73                       | 13.90                                    | 7.37                                   | 5.66                             |
| CN4     | 80.72                       | 12.18                                    | 7.10                                   | 6.63                             |

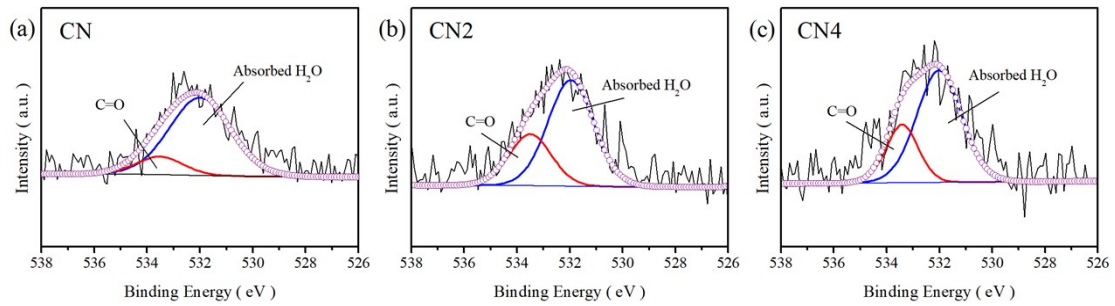**Fig. S1.** High resolution XPS spectra of O1s for (a) CN, (b) CN2, (c) CN4.**Table S2.** Variation of the N:C ratios and amino contents in samples.

| Samples | N:C (from EA) | N:C (from XPS) | -NH <sub>x</sub> |
|---------|---------------|----------------|------------------|
| CN      | 1.767         | 2.327          | 9.96             |
| CN2     | 1.711         | 2.288          | 7.37             |
| CN4     | 1.710         | 2.252          | 7.10             |

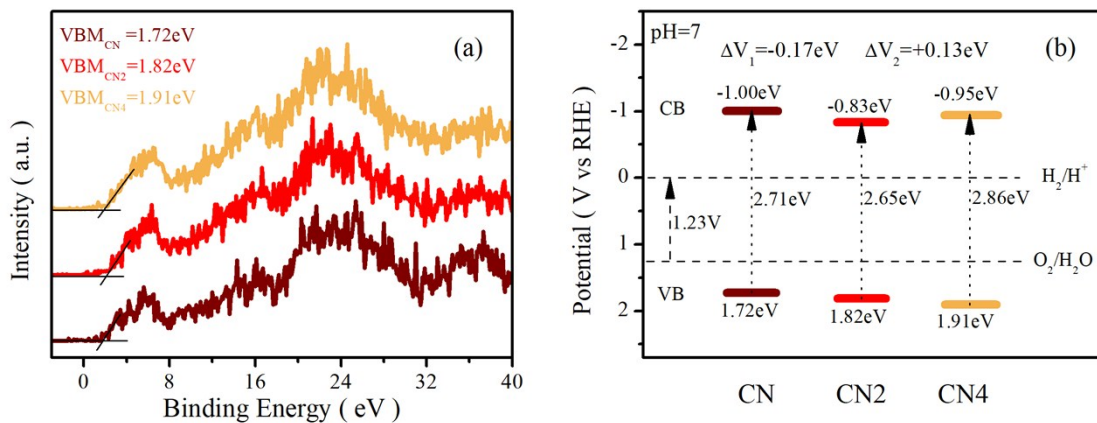**Fig. S2.** (a) VB XPS spectra, and (b) corresponding diagrammatic band structure of CN, CN2 and CN4.

**Table S3.** Dynamics analysis of TRPL emission decay for CN, CN2, and CN4.

| Samples | $\tau_1$ (ns) | $A_1$   | $\tau_2$ (ns) | $A_2$  | $\langle\tau\rangle$ (ns) |
|---------|---------------|---------|---------------|--------|---------------------------|
| CN      | 1.10          | 24406.1 | 5.34          | 252.27 | 1.20                      |
| CN2     | 1.32          | 10989.5 | 5.42          | 293.73 | 1.72                      |
| CN4     | 1.10          | 22065.5 | 5.21          | 316.94 | 1.34                      |

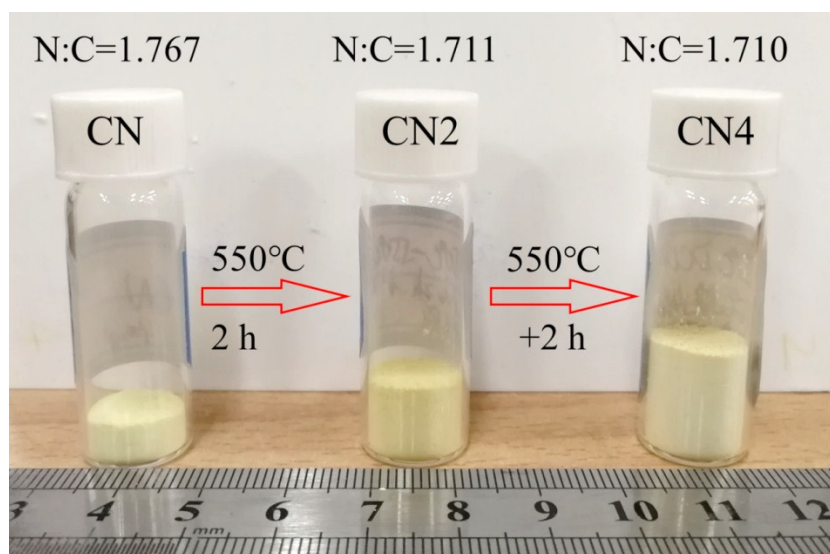

**Fig. S3.** Comparison of volume (300 mg) and color for CN, CN2, and CN4.

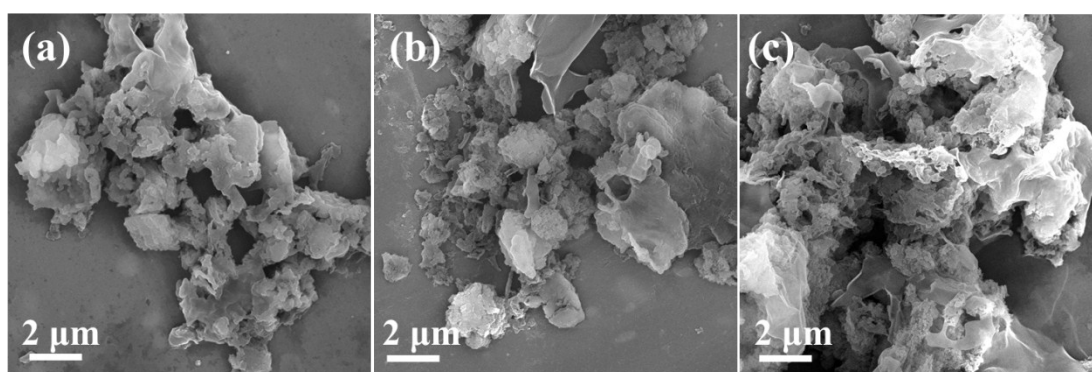

**Fig. S4.** SEM images of (a) CN, (b) CN2, and (c) CN4.

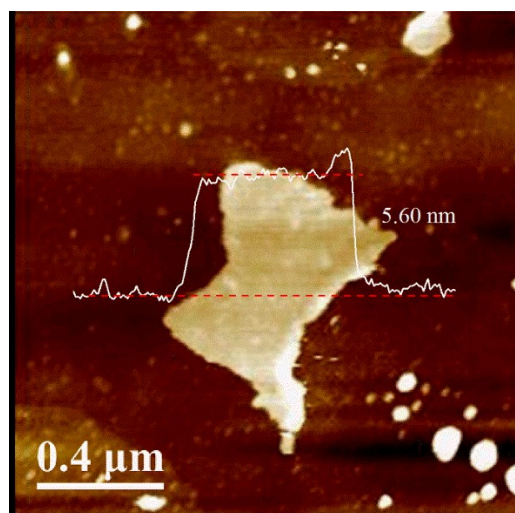

**Fig. S5.** AFM images of CN4 and the corresponding height curve.

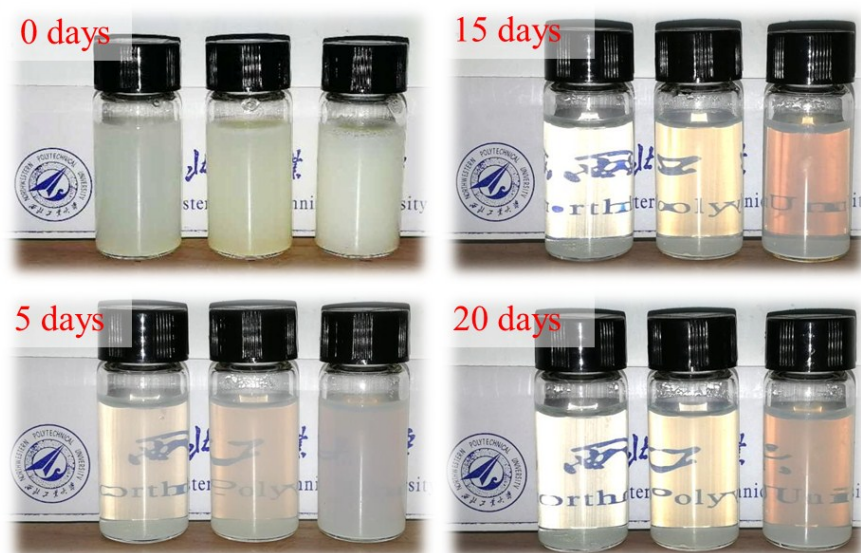

**Fig. S6.** Status of 10 mg photocatalysts dispersing in 10 mL water after natural sedimentation for different days. (left: CN, middle: CN2, right: CN4).

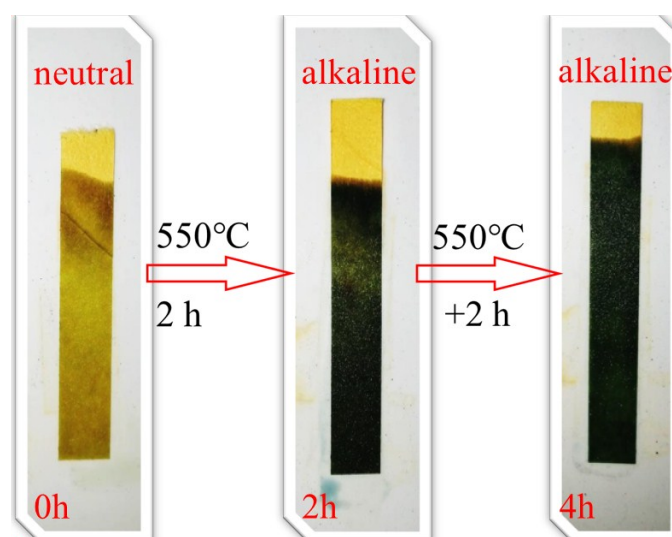

**Fig. S7.** Comparison of pH value for the tail gas solution obtained after the experiment finished.

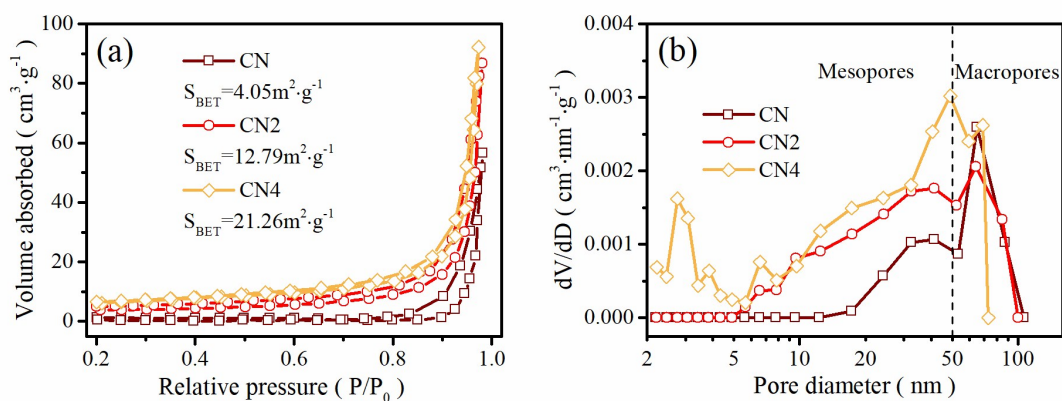

**Fig. S8.** (a)  $N_2$  adsorption-desorption isotherms and BET surface area measured at 77K, and (b) corresponding pore size distribution curves for CN, CN2, and CN4.

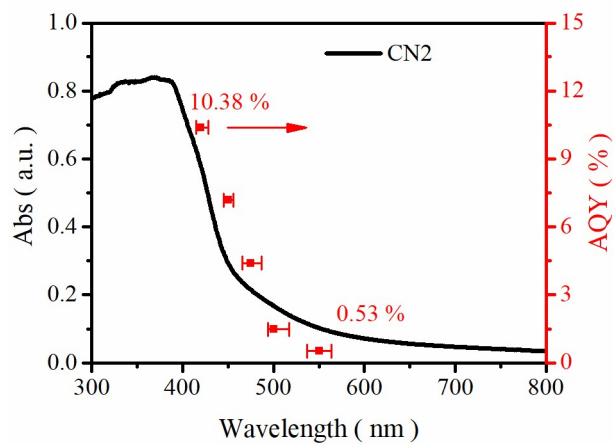

**Fig. S9.** Apparent quantum yields (AQYs) of CN2 under specific monochromatic light illuminating compared with the absorbance spectrum.
